# Supplementary material for: Effects of Bacillus subtilis T6-1 on the Rhizosphere Microbial Community Structure of Continuous Cropping Poplar
Source: MDPI journal article supplement (doi:10.3390/biology11050791), 2022-05-23
Supplement: s1 [file s1]

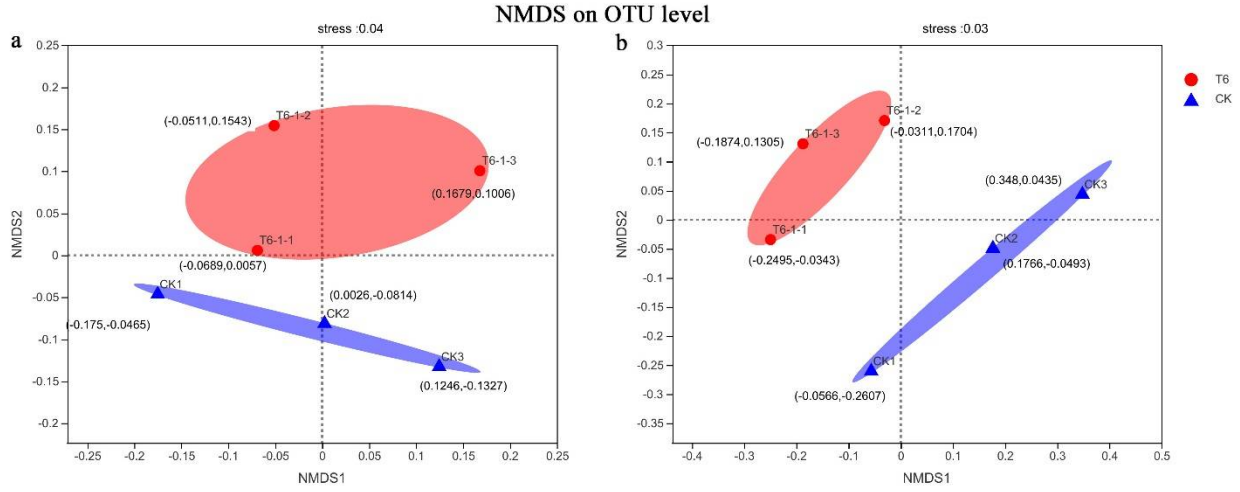

**Figure S1.** NMDS plots on OTU level showing the distribution patterns of **(a)** bacteria and **(b)** fung. Abundance data were transformed for equal sampling depth prior to generation of the distance matrix used for the non-metric multidimensional scaling (NMDS) plot. The Bray–Curtis index was used as the distance matrix. Stress < 0.05 showing good representativeness. The distance matrix of Bray-Curtis:  $D_{Bray-Curtis} = 1 - 2 \frac{\sum \min(S_{A,i}, S_{B,i})}{\sum S_{A,i} + \sum S_{B,i}}$ .  $S_{A,i}$  means the number of sequences contained in the  $i$ th taxon in sample A,  $S_{B,i}$  means the number of sequences contained in the  $i$ th taxon in sample B.
